# Supplementary material for: Variations in diurnal and seasonal net ecosystem carbon dioxide exchange in a semiarid sandy grassland ecosystem in China's Horqin Sandy Land
Source: Copernicus journal article supplement (doi:10.5194/bg-2020-89), 2020-04-21
Supplement: Supplementary file [file bg-2020-89-AC2-supplement.pdf]

1 *Supplemental material*

2 **Variations in diurnal and seasonal net ecosystem carbon dioxide**  
3 **exchange in a semiarid sandy grassland ecosystem in China's Horqin**  
4 **Sandy Land**

5 Yayi Niu et al.

6 *Correspondence to:* Yuqiang Li (liyq@lzb.ac.cn)

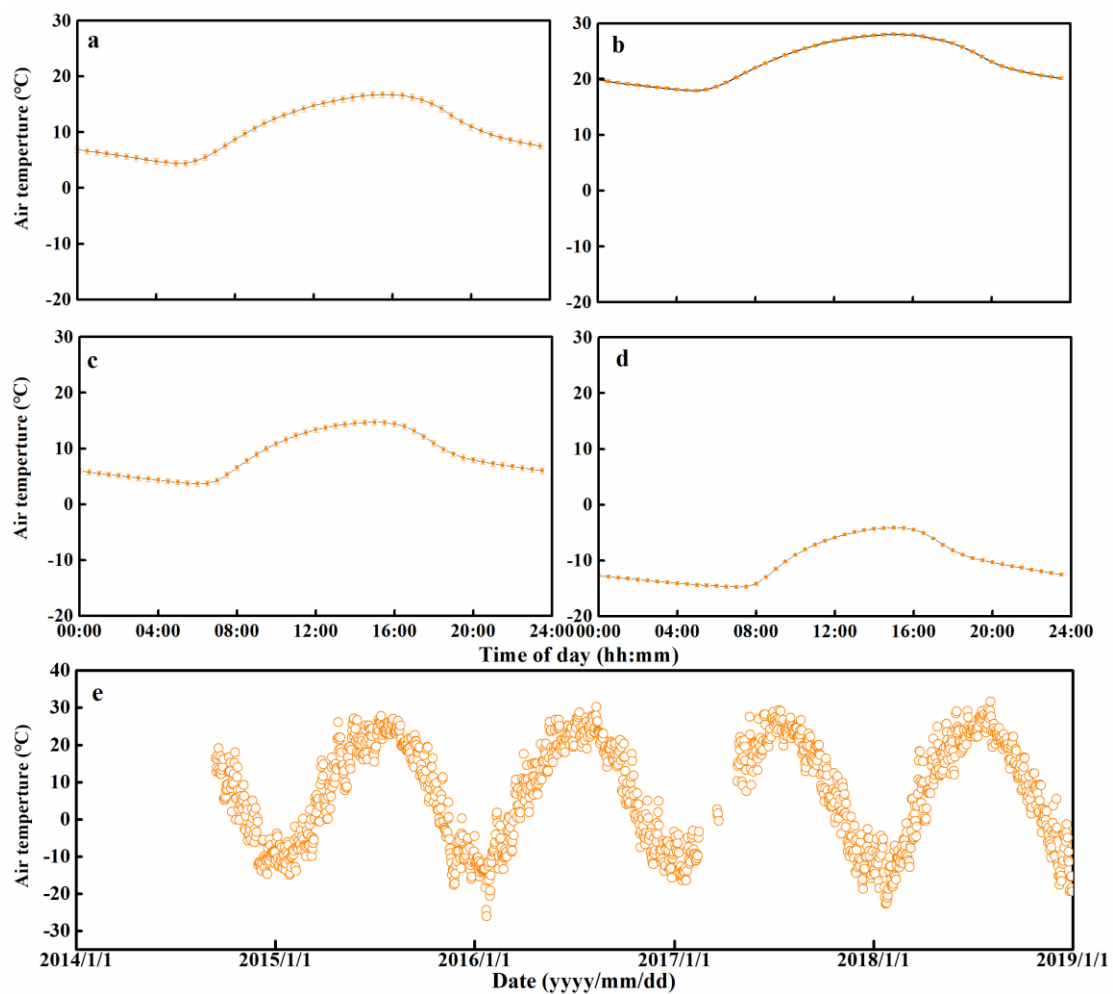

7  
8 **Fig. S1** | Air temperature ( $T_{air}$ ) measured 2 m above the ground surface: (a), (b), (c),  
9 and (d) are half-hourly mean values in spring, summer, autumn, and winter,  
10 respectively; (e) **Seasonal and inter-annual variation in daily average  $T_{air}$  from late 2014**  
11 **to late 2018.**

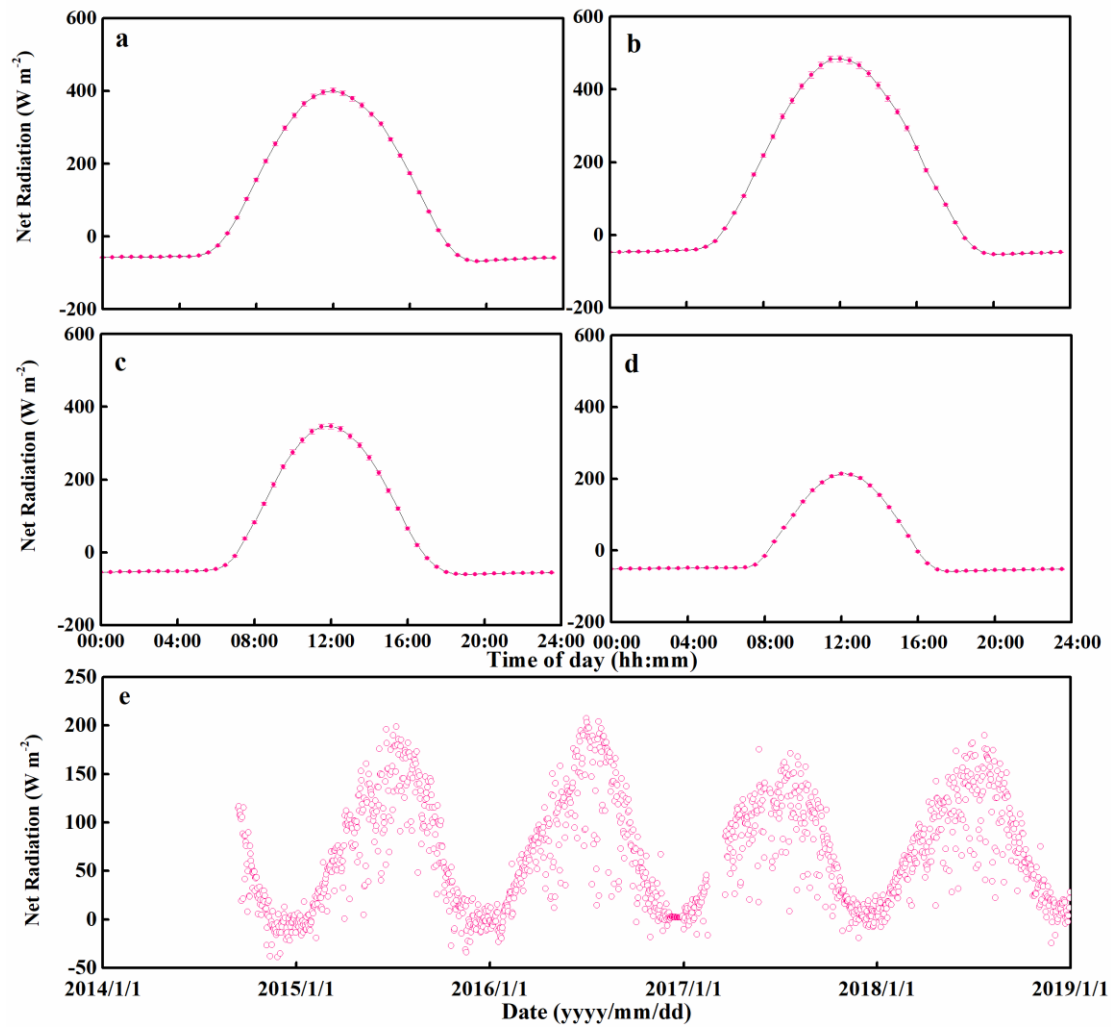

12

13 **Fig. S2** | Net radiation ( $R_n$ ) measured 2 m above the ground surface: (a), (b), (c), and

14 (d) are half - hourly mean values in spring, summer, autumn, and winter, respectively;

15 (e) Seasonal and inter-annual variation in daily average  $R_n$  from late 2014 to late 2018.

16

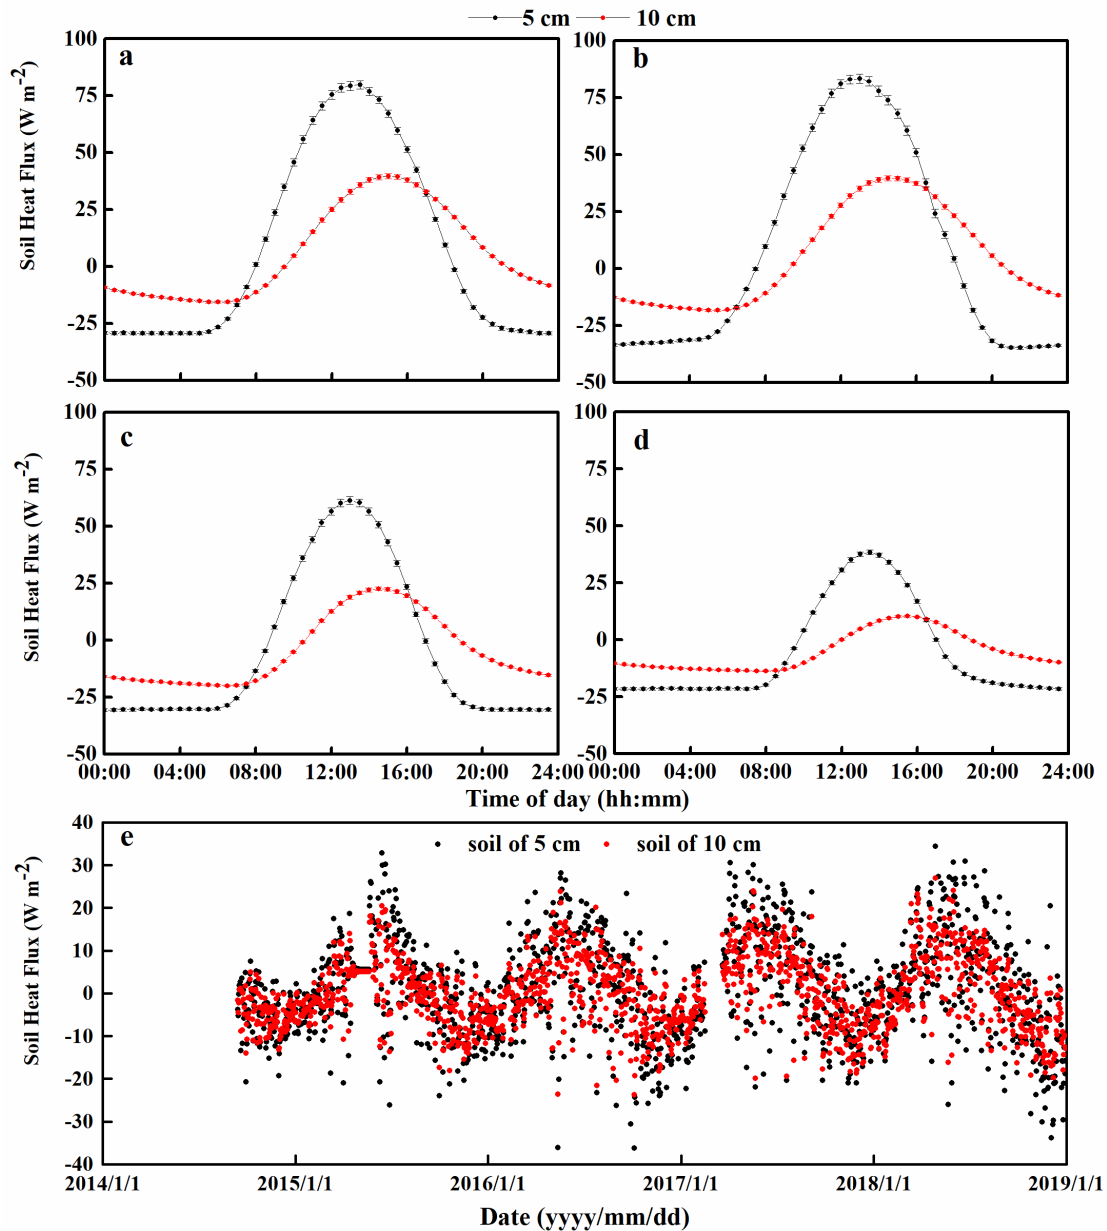

17

18 **Fig. S3** | Soil heat flux (SHF) at depths of 5 cm and 10 cm: (a), (b), (c), and (d) are

19 half - hourly mean values in spring, summer, autumn, and winter, respectively; (e)

20 Seasonal and inter-annual variation in daily average SHF at depths of 5 cm and 10 cm

21 from late 2014 to late 2018.

22

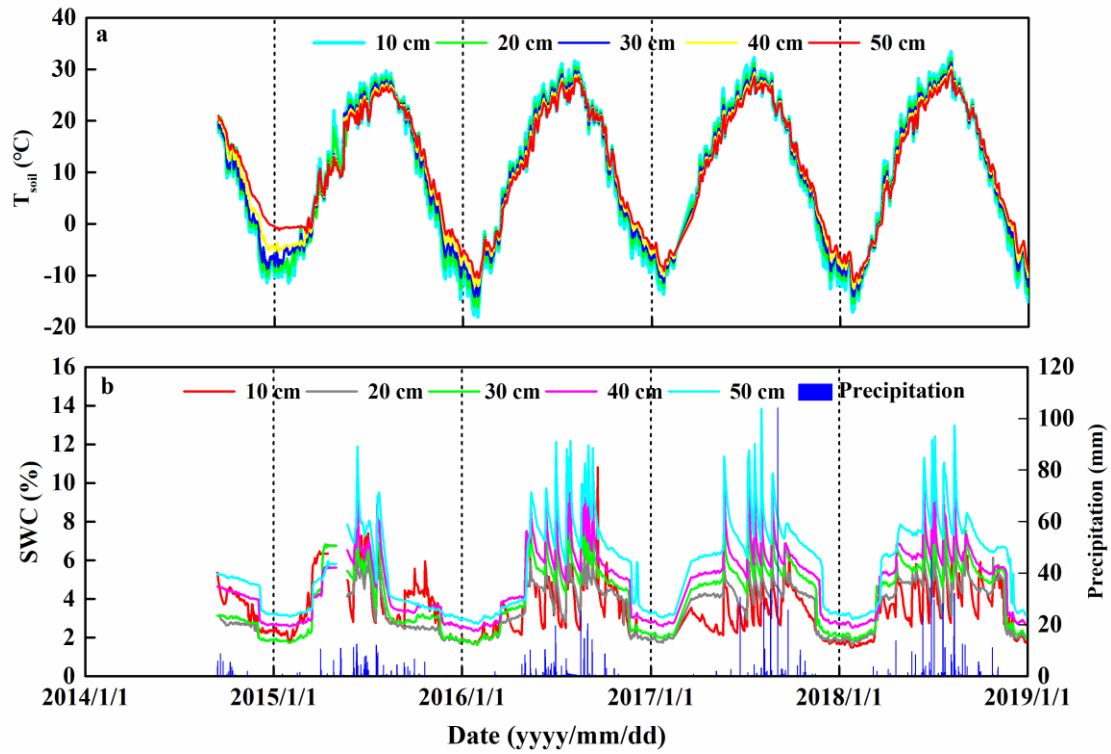

23

24 **Fig. S4 | (a) Seasonal and inter-annual variation in daily average soil temperature ( $T_{\text{soil}}$ )**  
 25 **and (b) soil water content (SWC) at depths of 10, 20, 30, 40, and 50 cm, and seasonal**  
 26 **and inter-annual variation in daily precipitation from late 2014 to late 2018.**

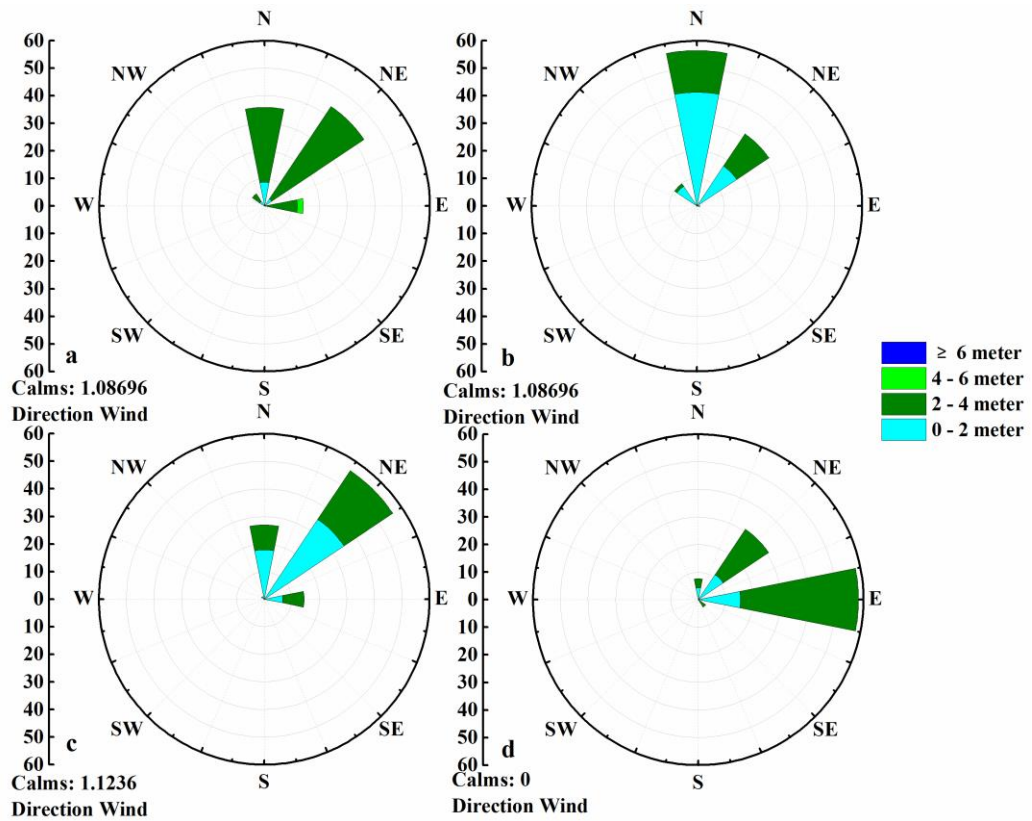

27

28 **Fig. S5** | Diurnal mean wind speeds and directions between 2015 and 2018: (a) spring,  
 29 (b) summer, (c) autumn, and (d) winter. Note that the wind direction means the direction  
 30 the wind blows *from*.

31 **Table S1** | Seasonal-scale correlations (Pearson's  $r$ ) between net ecosystem exchange ( $r_{NEE}$ ), gross primary productivity ( $r_{GPP}$ ), and ecosystem  
 32 respiration ( $r_{Rec}$ ) and the key environmental factors. N represents the sample size. Abbreviations: SWC, soil water content;  $T_{soil}$ , soil temperature.  
 33 \*\*,  $p < 0.01$ ; \*,  $p < 0.05$ .

34

| Environment<br>factors | Spring    |           |           |     | Summer    |           |           |     | Autumn    |           |           |     | Winter    |           |     | 2014-2018 |           |           |      |
|------------------------|-----------|-----------|-----------|-----|-----------|-----------|-----------|-----|-----------|-----------|-----------|-----|-----------|-----------|-----|-----------|-----------|-----------|------|
|                        | $r_{NEE}$ | $r_{GPP}$ | $r_{Rec}$ | N   | $r_{NEE}$ | $r_{GPP}$ | $r_{Rec}$ | N   | $r_{NEE}$ | $r_{GPP}$ | $r_{Rec}$ | N   | $r_{NEE}$ | $r_{Rec}$ | N   | $r_{NEE}$ | $r_{GPP}$ | $r_{Rec}$ | N    |
| SWC at 10 cm           | -0.167**  | 0.158**   | 0.138**   | 314 | -0.063    | 0.167**   | 0.225**   | 369 | 0.185**   | 0.330**   | 0.442**   | 418 | -0.004    | -0.004    | 379 | -0.254**  | 0.370**   | 0.380**   | 1476 |
| SWC at 20 cm           | -0.356**  | 0.467**   | 0.379**   | 314 | -0.060    | 0.164**   | 0.223**   | 369 | 0.138**   | 0.453**   | 0.509**   | 418 | -0.129    | -0.129    | 379 | -0.391**  | 0.532**   | 0.519**   | 1476 |
| SWC at 30 cm           | -0.391**  | 0.565**   | 0.533**   | 314 | -0.037    | 0.170**   | 0.273**   | 369 | 0.163**   | 0.465**   | 0.541**   | 418 | -0.255**  | -0.255**  | 379 | -0.433**  | 0.609**   | 0.610**   | 1476 |
| SWC at 40 cm           | -0.371**  | 0.631**   | 0.721**   | 314 | -0.062    | 0.199**   | 0.288**   | 369 | 0.094     | 0.539**   | 0.546**   | 418 | -0.210**  | -0.210**  | 379 | -0.464**  | 0.660**   | 0.669**   | 1476 |
| SWC at 50 cm           | -0.338**  | 0.623**   | 0.768**   | 314 | -0.168**  | 0.318**   | 0.347**   | 369 | 0.091     | 0.515**   | 0.523**   | 418 | -0.209**  | -0.209**  | 379 | -0.484**  | 0.688**   | 0.696**   | 1476 |
| $T_{soil}$ at 10 cm    | -0.507**  | 0.755**   | 0.742**   | 314 | -0.337**  | 0.485**   | 0.395**   | 369 | 0.211**   | 0.677**   | 0.765**   | 418 | -0.254**  | -0.254**  | 379 | -0.549**  | 0.758**   | 0.749**   | 1476 |
| $T_{soil}$ at 20 cm    | -0.515**  | 0.770**   | 0.760**   | 314 | -0.310**  | 0.494**   | 0.457**   | 369 | 0.211**   | 0.678**   | 0.766**   | 418 | -0.314**  | -0.314**  | 379 | -0.545**  | 0.758**   | 0.753**   | 1476 |
| $T_{soil}$ at 30 cm    | -0.519**  | 0.773**   | 0.761**   | 314 | -0.276**  | 0.490**   | 0.506**   | 369 | 0.211**   | 0.680**   | 0.767**   | 418 | -0.362**  | -0.362**  | 379 | -0.541**  | 0.756**   | 0.754**   | 1476 |
| $T_{soil}$ at 40 cm    | -0.524**  | 0.778**   | 0.763**   | 314 | -0.244**  | 0.490**   | 0.557**   | 369 | 0.209**   | 0.682**   | 0.767**   | 418 | -0.369**  | -0.369**  | 379 | -0.535**  | 0.753**   | 0.755**   | 1476 |
| $T_{soil}$ at 50 cm    | -0.526**  | 0.781**   | 0.765**   | 314 | -0.222**  | 0.488**   | 0.591**   | 369 | 0.207**   | 0.682**   | 0.765**   | 418 | -0.250**  | -0.250**  | 379 | -0.527**  | 0.748**   | 0.756**   | 1476 |

35
